# Supplementary material for: Type I interferons and TGF-β cooperate to induce liver fibrosis during HIV-1 infection under antiretroviral therapy
Source: JCI journal article supplement (doi:10.1172/jci.insight.152738), 2022-05-31

27 **Supplemental materials and methods:**

28

29 ***Histology and Immuno-histochemistry/fluorescence staining.***

30 For IHC, paraffin-embedded formalin-fixed liver sections (5 µm) from Hu-mice were  
31 stained with hematoxylin and eosin (H&E), Sirius red, or with the following primary  
32 antibodies after antigen retrieval: anti-human CD45 (1:2, #IS75130-2), CD3 (1:100,  
33 #A0452), CD68 (1:100, #M081401-2), all from Dako; CD163 (1:100, #ab87099) and  
34 MerTK (1:100, #ab52968) from Abcam. Then incubated with the secondary antibodies  
35 and revealed following the manufacturer's instructions (Dako and IHC World). For  
36 immunofluorescence staining, liver sections and HepSCs were stained for CD68 (1:100,  
37 #M081401-2), MerTK (1:100, #ab52968), ISG15 (1:200, Proteintech #15981-1-AP) and  
38 anti α-SMA (1:100, ab7817) respectively then detected by incubating with a secondary  
39 anti-mouse and anti-rabbit conjugated with Alexa Fluor 488 (1:500) and Alexa Fluor 555  
40 (1:500) (Invitrogen) respectively. Nuclei were counterstained with Hoechst 33342  
41 (Sigma). Sirius Red stained slides were digitally imaged at 20x objective in the Aperio  
42 ScanScope XT (Leica). Scanned slides have been divided into three groups (normal,  
43 light, and pale) based on the appearance of the green counterstain defining non-collagen  
44 tissue. Aperio color deconvolution algorithm v9 customized for each group of slides was  
45 used to separate collagen positive area (red) from the non-collagen (green), calculate  
46 size and percentage of the positive stain at each staining intensity (strong, medium, weak,  
47 negative) and generate the Score (0-300). The Score (0-300) = (3 x % Strong Positive) +  
48 (2 x % Medium Positive) + (1 x % Weak Positive). Input RGB values of the green stain  
49 were appropriately adjusted in the algorithms used for each group as well as the weak  
50 positive threshold. To exclude positively stained large blood vessels from the analysis the  
51 Genie tissue classifier was developed and added to the algorithm.

52

53 ***Culture and activation of primary human hepatic stellate cells.***

54 Primary human hepatic stellate cells (HepSCs) from 2 different donors (HepSC-74 and  
55 HepSC-75), were obtained from iXCells Biotechnologies company and expanded

56 following the manufacturer's instructions. All experiments were performed at passage 3.  
57 HepSCs were rested with Geltrex-coated plates for one day prior exposure to  
58 recombinant human TGF- $\beta$  (0.1-5 ng/ml, reference #240-B R&D Systems) and/or  
59 recombinant human type I interferons (IFN- $\alpha$ 2a and IFN- $\beta$ , 10-1000 U/ml; references  
60 #11100-1 and #11410-2 PBL Science respectively) in DMEM without FBS for one hour  
61 or two days. For IFN- $\alpha/\beta$  receptor (IFNAR) blockade, rested HepSCs were incubated for  
62 one hour with either 10 ug/ml of anti-IFNAR antibody or isotype control (reference  
63 #MAB003 R&D Systems). For TGF- $\beta$  neutralization experiment, 1 ng/ml of TGF- $\beta$  were  
64 incubated for an hour with 5 ug/ml of either anti- TGF- $\beta$  antibody (reference # MAB1835-  
65 500 R&D Systems) or isotype control before HepSCs exposure.

66

#### 67 ***Immunoblot blot.***

68 Total proteins were extracted from fresh liver tissues or HepSCs using a RIPA buffer  
69 (Thermo Scientific) with protease and phosphatase inhibitor cocktail (Pierce). Protein  
70 extracts were resolved on SDS-PAGE (12%), transferred onto a nitrocellulose membrane  
71 and incubated with the following primary antibodies at 1:250 to 1:1000 dilution: phospho-  
72 SMAD2/3 (#8828) , phospho-STAT1 Tyr701 (#9167), phospho-STAT1 Ser727 (#8826),  
73 phospho-p38 (#4511) and phospho-ERK1/2 (#9101) and total SMAD2/3 (#8685), STAT1  
74 (#14994), p38 (#9212), ERK1/2 (#4695), all from Cell Signal;  $\alpha$ -SMA (1:100, ab7817),  
75 CCND1 (#ab16663), CCNA2 (#ab181591) from Abcam and  $\beta$ -actin (#A3854,  
76 Sigma/Millipore); secondary antibodies were either anti-mouse or anti-rabbit coupled with  
77 horseradish peroxidase, and bands were revealed using the ECL (Millipore and  
78 Invitrogen) with BioRad CCD camera.

79

#### 80 ***Quantification of secreted proteins by ELISA.***

81 Soluble human CD163 (sCD163, DuoSet # DY1607 from R&D Systems), ALT  
82 (#XPEM0829 from XpressBio), Hyaluronic acid (HA, Echelon Biosciences Inc), TGF- $\beta$   
83 (RND #DB100C), OAS1 (LSBio #LS-F31934-1) and IP-10 (RND #DIP100) secretions

84 were detected in plasmas and analyzed by ELISA following the manufacturer's  
85 instructions.

86 ***mRNAs expression analysis.***

87 Total RNA was extracted from cells (RNeasy Plus Kit, QIAGEN) and from liver tissues  
88 using QIAzol Lysis Reagent and gDNA Eliminator Solution (RNeasy Plus Universal Kits,  
89 QIAGEN), and quantified using Nanodrop. 0.2-2 µg of total RNAs were used for cDNA  
90 preparation by reverse transcription with random primers and SuperScript III (Invitrogen),  
91 according to the manufacturer's instructions. Two µl of diluted (1:10) cDNA were used for  
92 quantification with the Power SyBR Green PCR Master Mix (Applied Biosystems) on the  
93 QuantStudio 6 flex (Applied Biosystems, Foster City, CA), using specific primers (Table  
94 S3 and S4). The comparative Ct method was used for the analysis of real-time PCR  
95 data(1, 2). Data were normalized using human or mouse Gapdh as the housekeeping  
96 gene and expressed as the relative mRNA level compared to the controls.

97

98

99 **Table S1.** Comparison of ART doses for HIV treatment in food pellets (mg/kg).

100 **Table S2.** Summary of NRG-hu mouse cohorts 1, 2 and 3 defined by HSC donors and  
101 individual mice.

102 **Table S3.** Human oligonucleotides/PCR primers used in the study.

103 **Table S4.** Mouse oligonucleotides/PCR primers used in the study.

104 **Table S5.** Summary of NRG-hu mouse cohorts 4 and 5, and individual mice

105 **Table S6.** Summary of Clinical information of Human cohort and individual specimens

106

107 **Figure S1. Assessment of liver injury and fibrosis during HIV infection and ART**  
108 **regimen. (A)** Microscopic analysis of fibrosis incidence (SR<sup>+</sup> vs SR<sup>-</sup>) in the liver of  
109 humanized mice. **(B)** Detection by RT-qPCR of fibrosis genes (mouse α-SMA, Col.7a1,  
110 Timp1 and MMP-13) in the liver of humanized mice infected with HIV-1 and treated with

111 cART and their littermate controls. Data were normalized with mouse Gapdh. Bars  
112 indicate the median. Statistical analysis was performed with one-way Anova and Turkey  
113 test; \*p < 0.05; \*\*p < 0.005.

114

115 **Figure S2. Characterization of liver infiltrated human immune cells. (A)**  
116 Immunofluorescence validation for anti-MerTK antibody versus isotype control (green)  
117 using liver sections from HIV/cART mice. Illustration of single staining and their merge.  
118 Co-staining with isotype antibody (green) and nuclei (bleu) by immunofluorescence in  
119 liver sections of HIV/cART mice. Images were acquired with 20x magnification lens.

120

121 **Figure S3. Optimization of resting and activating primary human hepatic stellate**  
122 **Cells (HepSCs).** RT-qPCR analysis of HepSC activation genes ( $\alpha$ -SMA and Col.1a1).  
123 **(A)** Geltrex prevents the auto-activation of human primary hepatic stellate cells in vitro ( $\alpha$ -  
124 SMA and Col.1a1). **(B)** TGF- $\beta$  activates HepSCs in a dose-dependent manner ( $\alpha$ -SMA  
125 and Col.1a1). Data were normalized with Gapdh. Histograms represent the average of  
126 different independent experiments. Error bars indicate the SEM. Statistical analysis was  
127 performed with one-way Anova and Fisher's LSD test; \*p < 0.05; \*\*p < 0.005; \*\*\*p <  
128 0.0005; \*\*\*\*p < 0.00005.

129

130 **Figure S4. IFN- $\beta$  induces activation of primary human hepatic stellate cells.** Dose-  
131 dependent activation of HepSCs by IFN- $\beta$ ; **(A)** RT-qPCR analysis of hepatic stellate cell  
132 activation genes  $\alpha$ -SMA and Col.1a1. Histograms represent the average of different  
133 independent experiments. Error bars indicate the SEM. Statistical analysis was performed  
134 with one-way Anova and Fisher's LSD test; \*p < 0.05; \*\*p < 0.005.

135

136 **Figure S5. Synergistic effect of IFN- $\alpha$ 2a and TGF- $\beta$  on activation of human HepSCs**  
137 **from Donor #2;** RT-qPCR analysis of hepatic stellate cell activation genes **(A)**  $\alpha$ -SMA  
138 and **(B)** Col.1a1. Histograms represent the average of different independent experiments.

139 Error bars indicate the SEM. Statistical analysis was performed with one-way Anova and  
140 Fisher's LSD test; \*p < 0.05; \*\*p < 0.005.

141

142 **Figure S6. Effects of IFN- $\alpha$ 2a and TGF- $\beta$  on genes involved in**  
143 **proliferation/apoptosis of primary human hepatic stellate Cells. (A)** RT-qPCR  
144 (CCNA2, CCND1 and PCNA) and **(B)** Immunoblot (CCNA2 and CCND1) analysis of cell  
145 proliferation markers. Histograms represent the average of different independent  
146 experiments. Error bars indicate the SEM. Statistical analysis was performed with one-  
147 way Anova and Fisher's LSD test.

148

149 **Figure S7. Blocking of IFN- $\alpha/\beta$  receptor prevents the accumulation of human M2-**  
150 **like macrophages in the liver of HIV-infected mice under cART. (A)**  
151 Immunohistochemistry staining for human CD45, CD68 and CD163 in the liver of  
152 humanized mice infected with HIV and treated with cART and their littermate controls.

153

154 **Figure S8. Confirmation of IFN-I blockade alleviates HIV/ART induced liver fibrosis**  
155 **in humanized mice in two supplemental cohorts 4 and 5.** For post-HIV infection,  
156 animals were treated with cART for 9 weeks and blood and liver samples collected at  
157 week 13 for analysis. Elisa detection of **(A)** ALT and **(B)** Hyaluronic acid (HA) in plasmas  
158 at week 13. Quantification of fibrosis markers **(C)**  $\alpha$ -SMA and **(D)** TGF- $\beta$  by RT-qPCR in  
159 the liver at week 13. Bars in the scatter plots represent the median value. Statistical  
160 analysis was performed with one-way ANOVA and Turkey's post-hoc test; \*p < 0.05; \*\*p  
161 < 0.005; \*\*\*p < 0.0005.

162

163

164

165

166

## REFERENCES

167

- 168 1. Ahodantin J, Bou-Nader M, Cordier C, Megret J, Soussan P, Desdouets C, et al. Hepatitis B virus X  
169 protein promotes DNA damage propagation through disruption of liver polyploidization and  
170 enhances hepatocellular carcinoma initiation. *Oncogene*. 2019;38(14):2645-57.
- 171 2. Ahodantin J, Lekbaby B, Bou Nader M, Soussan P, and Kremsdorf D. Hepatitis B virus X protein  
172 enhances the development of liver fibrosis and the expression of genes associated with  
173 epithelial-mesenchymal transitions and tumor progenitor cells. *Carcinogenesis*. 2020;41(3):358-  
174 67.

175

Table S1. Comparison of ART doses for HIV treatment in food pellets (mg/kg)

|                                     | Current Study | Halper-Stromberg A, et al. Cell 2014 | Lavender KJ, et al. AIDS 2018 | Nischang M, et al. PlosOne 2012 |
|-------------------------------------|---------------|--------------------------------------|-------------------------------|---------------------------------|
| Tenofovir Disoproxil Fumarate (TDF) | 1,560         | 720                                  | 720                           | 500                             |
| Emtricitabine (FTC)                 | 1,040         | 520                                  | 520                           | N/A                             |
| Raltegravir (RAL)                   | 4,800         | 4800                                 | 4800                          | N/A                             |
| Lamivudine (3TC)                    | N/A           | N/A                                  | N/A                           | 500                             |
| Azidothymidine (AZT)                | N/A           | N/A                                  | N/A                           | 500                             |
| Ritonavir (RTV)                     | N/A           | N/A                                  | N/A                           | 1000                            |

- N/A : Not Applicable



Table S2. Summary of NRG-hu mouse cohorts and individual mice

| HSC donors | Mouse ID | %hCD45 | Status                | Duration of cART | HIV titer (xLog <sub>10</sub> c/ml) at termination |
|------------|----------|--------|-----------------------|------------------|----------------------------------------------------|
| 1          | 111      | 40.9   | Mock                  | NA               | UD                                                 |
| 1          | 112      | 77.9   | Mock                  | NA               | UD                                                 |
| 1          | 113      | 76.8   | Mock                  | NA               | UD                                                 |
| 1          | 114      | 82.3   | Mock                  | NA               | UD                                                 |
| 1          | 115      | 84.7   | Mock                  | NA               | UD                                                 |
| 1          | 116      | 75.0   | HIV-1                 | NA               | 5.45                                               |
| 1          | 117      | 70.1   | HIV-1                 | NA               | 5.82                                               |
| 1          | 118      | 66.7   | HIV-1                 | NA               | 4.94                                               |
| 1          | 119      | 68.3   | HIV-1                 | NA               | 5.16                                               |
| 1          | 124      | 50.3   | HIV-1                 | NA               | 6.34                                               |
| 1          | 125      | 46.7   | HIV-1                 | NA               | 5.21                                               |
| 1          | 127      | 38.2   | HIV-1                 | NA               | 5.17                                               |
| 1          | 120      | 52.4   | HIV-1+cART            | 8w               | UD                                                 |
| 1          | 121      | 56.3   | HIV-1+cART            | 8w               | UD                                                 |
| 1          | 122      | 61.0   | HIV-1+cART            | 8w               | UD                                                 |
| 1          | 123      | 48.0   | HIV-1+cART            | 8w               | UD                                                 |
| 1          | 128      | 67.3   | HIV-1+cART            | 8w               | UD                                                 |
| 1          | 129      | 72.2   | HIV-1+cART            | 8w               | UD                                                 |
| 1          | 130      | 75.7   | HIV-1+cART            | 8w               | UD                                                 |
| 2          | 50       | 92.8   | Mock                  | NA               | UD                                                 |
| 2          | 51       | 93.6   | Mock                  | NA               | UD                                                 |
| 2          | 52       | 90.9   | HIV-1+cART+Iso        | 8w               | UD                                                 |
| 2          | 53       | 88.2   | HIV-1+cART+Iso        | 8w               | UD                                                 |
| 2          | 58       | 84.9   | HIV-1+cART+Iso        | 8w               | UD                                                 |
| 2          | 59       | 86.2   | HIV-1+cART+Iso        | 8w               | UD                                                 |
| 2          | 60       | 91.5   | HIV-1+cART+Iso        | 8w               | UD                                                 |
| 2          | 61       | 78.0   | HIV-1+cART+Iso        | 8w               | UD                                                 |
| 2          | 62       | 83.8   | HIV-1+cART+Iso        | 8w               | UD                                                 |
| 3          | 3707     | 71.0   | Mock                  | NA               | UD                                                 |
| 3          | 3708     | 81.2   | Mock                  | NA               | UD                                                 |
| 3          | 3709     | 83.1   | Mock                  | NA               | UD                                                 |
| 3          | 3710     | 61.7   | Mock                  | NA               | UD                                                 |
| 3          | 3698     | 42.1   | cART                  | 9w               | UD                                                 |
| 3          | 3700     | 75.6   | cART                  | 9w               | UD                                                 |
| 3          | 3701     | 62.1   | cART                  | 9w               | UD                                                 |
| 3          | 3711     | 68.1   | cART                  | 9w               | UD                                                 |
| 3          | 3712     | 47.2   | cART                  | 9w               | UD                                                 |
| 3          | 3688     | 76.6   | HIV-1                 | NA               | 7                                                  |
| 3          | 3689     | 81.4   | HIV-1                 | NA               | 8                                                  |
| 3          | 3690     | 78.1   | HIV-1                 | NA               | 7                                                  |
| 3          | 3691     | 86.7   | HIV-1                 | NA               | 7                                                  |
| 3          | 3692     | 83.1   | HIV-1                 | NA               | 7                                                  |
| 3          | 3683     | 67.5   | HIV-1+cART+Iso        | 9w               | UD                                                 |
| 3          | 3684     | 62.2   | HIV-1+cART+Iso        | 9w               | UD                                                 |
| 3          | 3685     | 76.3   | HIV-1+cART+Iso        | 9w               | UD                                                 |
| 3          | 3686     | 56.8   | HIV-1+cART+Iso        | 9w               | UD                                                 |
| 3          | 3693     | 51.5   | HIV-1+cART+Iso        | 9w               | UD                                                 |
| 3          | 3694     | 72.3   | HIV-1+cART+Iso        | 9w               | UD                                                 |
| 3          | 3695     | 88.5   | HIV-1+cART+anti-IFNAR | 9w               | UD                                                 |
| 3          | 3696     | 81.4   | HIV-1+cART+anti-IFNAR | 9w               | UD                                                 |
| 3          | 3697     | 75.6   | HIV-1+cART+anti-IFNAR | 9w               | UD                                                 |
| 3          | 3702     | 83.7   | HIV-1+cART+anti-IFNAR | 9w               | UD                                                 |
| 3          | 3703     | 83.4   | HIV-1+cART+anti-IFNAR | 9w               | UD                                                 |
| 3          | 3704     | 80.6   | HIV-1+cART+anti-IFNAR | 9w               | UD                                                 |
| 3          | 3705     | 87.4   | HIV-1+cART+anti-IFNAR | 9w               | UD                                                 |
| 3          | 3706     | 83.5   | HIV-1+cART+anti-IFNAR | 9w               | UD                                                 |

cART : combined Anti-Retroviral Therapy, IFNAR : Interferon alpha/beta Receptor, W : Week, N/A : Not Applicable, U/D : Undetectable

Table S3. Human oligonucleotides/PCR primers used in the study

| Primers ID    | Forward                        | Reverse                |
|---------------|--------------------------------|------------------------|
| TGF- $\beta$  | GACATCAACGGGTTCACTACCG         | AGAAGCAGGAAAGGCCGGTT   |
| $\alpha$ -sma | GCCAAGCACTGTCAGGAATC           | TTGTACACACCAAGGCAGT    |
| Gapdh         | GGAGTCAACGGATTTGGT             | AAGATGGTGATGGGATTTCCA  |
| CD163         | GGGCTAATTCCAGTGCAGGT           | GCTGACTCATTCCCACGACA   |
| COL.1a1       | TCTGGCGCTCCCATGGCTCT           | GCCCTGCGGCACAAGGGATT   |
| ISG15         | CGCAGATCACCCAGAAGATCG          | TTCGTGCGATTTGTCCACCA   |
| IFITM3        | ATGTCGTCTGGTCCCTGTTC           | GTCATGAGGATGCCAGAAT    |
| Mx-1          | GGTGGTCCCCAGTAATGTGG           | CGTCAAGATTCCGATGGTCTT  |
| Mx-2          | CAGAGGCAGCGGAATCGTAA           | TGAAGCTCTAGCTCGGTGTTT  |
| IFN- $\beta$  | GTGCCTGGACCATAGTCAGAGTGG       | TGTCCAGTCCCAGAGGCACAGG |
| MerTK         | AATGACAAAGGGCTGACCGT           | TGTGCAGTGCTGTTACGGAT   |
| CCNA2         | IDT DNA ref. Hs.PT.56a.4535284 |                        |
| CCND1         | IDT DNA ref. Hs.PT.56a.4930170 |                        |
| PCNA          | IDT DNA ref. Hs.PT.58.4761611  |                        |

Table S4. Mouse oligonucleotides/PCR primers used in the study

| Primers ID    | Forward                        | Reverse                 |
|---------------|--------------------------------|-------------------------|
| $\alpha$ -sma | GAGACTCTCTCCAGCCATCT           | CCTGACAGGACGTTGTTAGC    |
| ISG15         | AAGCAGCCAGAAGCAGACTC           | GTGACGGACACCAGGAAATC    |
| OAS1          | GGCTGAAGAGGCTGATGTGT           | CAGTTCTCTCCACCTGCTC     |
| Mx-2          | GTGGCAGAGGGAGAATGTCG           | TAAAACAGCATAACCTTTTGCGA |
| IFITM3        | GAGGATTCCGACTTCCGGTC           | TGTACACCTGCGTGTAGGG     |
| Gapdh         | AGACGGCCGCATCTTCTTGTCGA        | GCCCAATACGGCCAAATCCGTTC |
| Col.7a1       | IDT DNA ref. Mm.PT.58.32041766 |                         |
| Timp1         | IDT DNA ref. Mm.PT.58.30682575 |                         |
| MMP-13        | IDT DNA ref. Mm.PT.58.42286812 |                         |

Table S5. Summary of NRG-hu mouse cohorts 4 and 5, and individual mice

| Cohort | Mouse ID | Status                | %hCD45 | Duration of cART | HIV titer (xLog10 c/ml) at termination |
|--------|----------|-----------------------|--------|------------------|----------------------------------------|
| 4      | 1986     | Mock                  | 76.8   | N/A              | UD                                     |
| 4      | 1987     | Mock                  | 82.3   | N/A              | UD                                     |
| 4      | 1988     | Mock                  | 84.7   | N/A              | UD                                     |
| 4      | 1989     | HIV-1                 | 75     | N/A              | 7.5                                    |
| 4      | 1990     | HIV-1                 | 70.2   | N/A              | 6.9                                    |
| 4      | 1991     | HIV-1                 | 68.8   | N/A              | 7.1                                    |
| 4      | 1993     | HIV-1+cART+Iso        | 83.7   | 9 w              | UD                                     |
| 4      | 1995     | HIV-1+cART+Iso        | 78.7   | 9 w              | UD                                     |
| 4      | 1996     | HIV-1+cART+Iso        | 84.1   | 9 w              | UD                                     |
| 4      | 1997     | HIV-1+cART+Iso        | 74.2   | 9 w              | UD                                     |
| 4      | 1998     | HIV-1+cART+anti-IFNAR | 81     | 9 w              | UD                                     |
| 4      | 1999     | HIV-1+cART+anti-IFNAR | 70.9   | 9 w              | UD                                     |
| 4      | 2000     | HIV-1+cART+anti-IFNAR | 69.4   | 9 w              | UD                                     |
| 4      | 2001     | HIV-1+cART+anti-IFNAR | 86.3   | 9 w              | UD                                     |
| 4      | 2002     | HIV-1+cART+anti-IFNAR | 74.5   | 9 w              | UD                                     |
| 5      | 2457     | Mock                  | 61.7   | N/A              | UD                                     |
| 5      | 2458     | Mock                  | 42.1   | N/A              | UD                                     |
| 5      | 2382     | HIV-1                 | 75.6   | N/A              | 6.1                                    |
| 5      | 2390     | HIV-1                 | 62.1   | N/A              | 5.2                                    |
| 5      | 2403     | HIV-1                 | 68.1   | N/A              | 4.9                                    |
| 5      | 2392     | HIV-1+cART+Iso        | 47.2   | 9 w              | UD                                     |
| 5      | 2396     | HIV-1+cART+Iso        | 45.6   | 9 w              | UD                                     |
| 5      | 2399     | HIV-1+cART+Iso        | 34.1   | 9 w              | UD                                     |
| 5      | 2400     | HIV-1+cART+Iso        | 40.9   | 9 w              | UD                                     |
| 5      | 2376     | HIV-1+cART+anti-IFNAR | 47.4   | 9 w              | UD                                     |
| 5      | 2377     | HIV-1+cART+anti-IFNAR | 36.6   | 9 w              | UD                                     |
| 5      | 2378     | HIV-1+cART+anti-IFNAR | 29.3   | 9 w              | UD                                     |
| 5      | 2384     | HIV-1+cART+anti-IFNAR | 36.9   | 9 w              | UD                                     |

cART : combined Anti-Retroviral Therapy, IFNAR : Interferon alpha/beta Receptor, W : Week, N/A : Not Applicable, U/D : Undetectable

Table S6. Summary of Clinical information of Human cohort and individual specimens

| Specimens ID | Age (years) | Gender | HIV status | Antiretroviral therapy (ART)                                          |                   | ALT (U/L) |
|--------------|-------------|--------|------------|-----------------------------------------------------------------------|-------------------|-----------|
|              |             |        |            | Combination                                                           | Duration (months) |           |
| RPS009       | 52          | Male   | Positive   | Abacavir/dolutegravir/lamivudine                                      | >=6               | 43.79     |
| RUM031       | 52          | Male   | Positive   | Darunavir, Truvada, Ritonavir                                         | >=6               | 44.18     |
| RUM047       | 60          | Male   | Positive   | Abacavir/Lamivudine, Darunavir, Ritonavir                             | >=6               | 11.63     |
| RUMCHB       | 54          | Female | Positive   | Epzicom, Isentress                                                    | >=6               | 13.03     |
| RUMMNC       | 43          | Male   | Positive   | Darunavir, Truvada, Ritonavir                                         | >=6               | 16.37     |
| RUMTES       | 57          | Male   | Positive   | Triumeq                                                               | >=6               | 75.48     |
| RWJ006       | 58          | Female | Positive   | Odefsey (had been switched from Complera <30 days prior to screening) | >=6               | 23.03     |
| RWJ007       | 63          | Female | Positive   | Descovy, Raltegravir                                                  | >=6               | 24.62     |
| RWJ008       | 65          | Male   | Positive   | Emtricitabine and Tenofovir, Isentress                                | >=6               | 12.74     |
| BH001        | 33          | Male   | Negative   | N/A                                                                   | N/A               | 11.58     |
| KL002        | 52          | Male   | Negative   | N/A                                                                   | N/A               | 17.55     |
| AA003        | 35          | Male   | Negative   | N/A                                                                   | N/A               | 13.46     |
| AK004        | 37          | Female | Negative   | N/A                                                                   | N/A               | 18.33     |
| BTS005       | 33          | Male   | Negative   | N/A                                                                   | N/A               | 16.90     |
| AG006        | 41          | Male   | Negative   | N/A                                                                   | N/A               | 21.48     |
| SS007        | 39          | Female | Negative   | N/A                                                                   | N/A               | 20.87     |
| RKM 008      | 40          | Male   | Negative   | N/A                                                                   | N/A               | 20.68     |

HIV negative specimens are healthy donors

N/A = Not applicable

A

| Liver Fibrosis |               |
|----------------|---------------|
| Groups         | Incidence (%) |
| Mock           | 0/4 (0)       |
| cART           | 1/5 (20)      |
| HIV-1          | 0/5 (0)       |
| HIV-1+cART     | 4/6 (66.7)    |

B

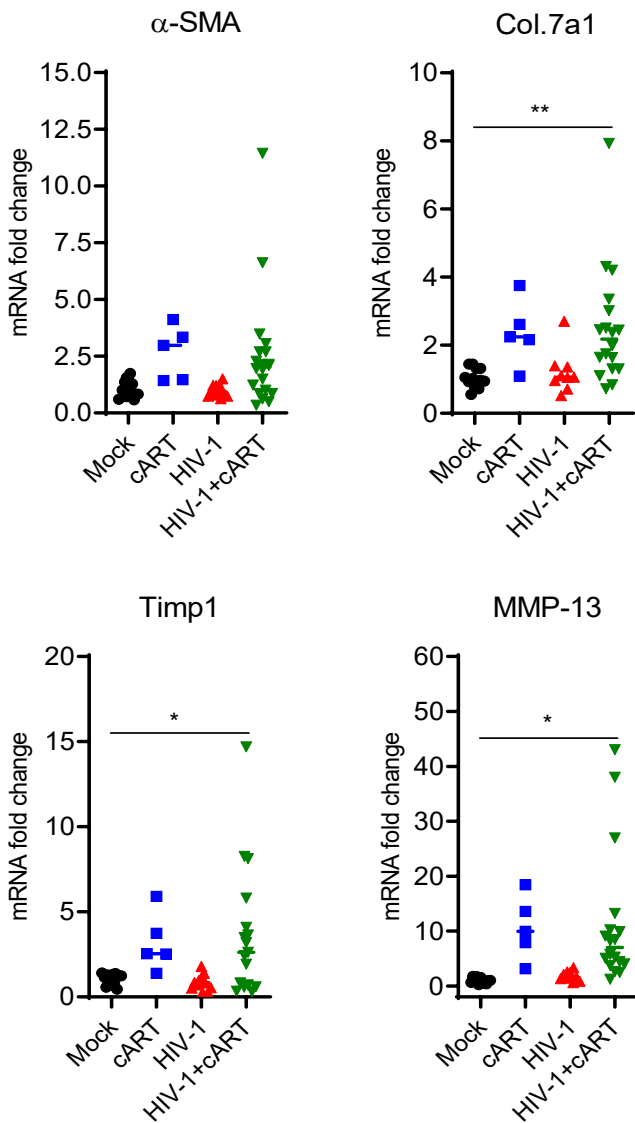

A

HIV-1+cART

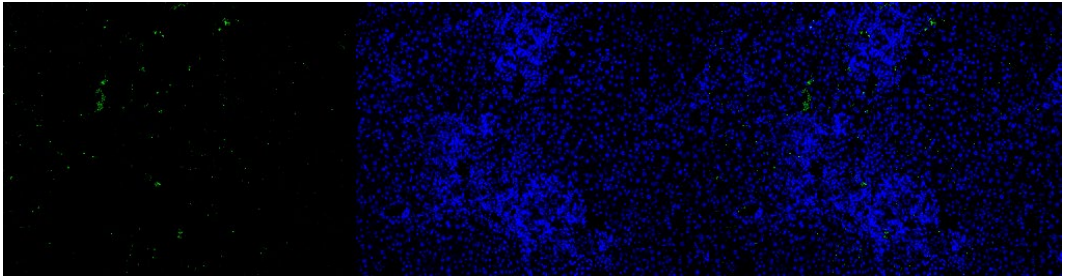

Isotype vs anti-MerTK

Nuclei

Merge

A

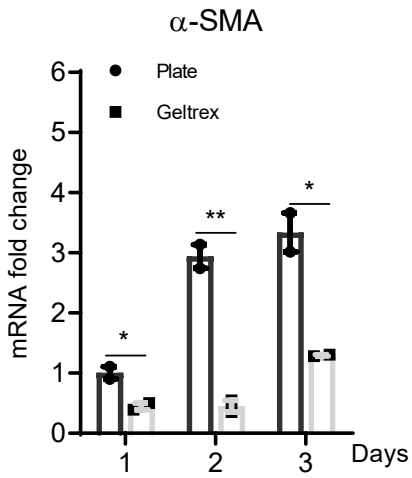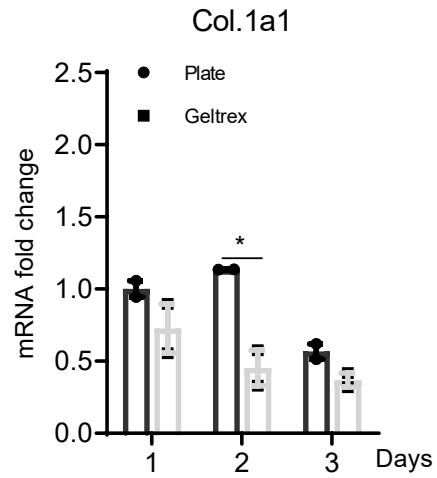

B

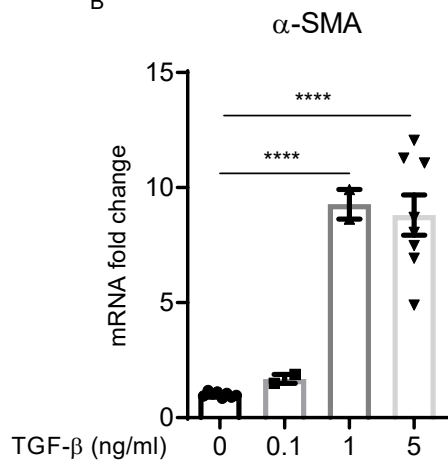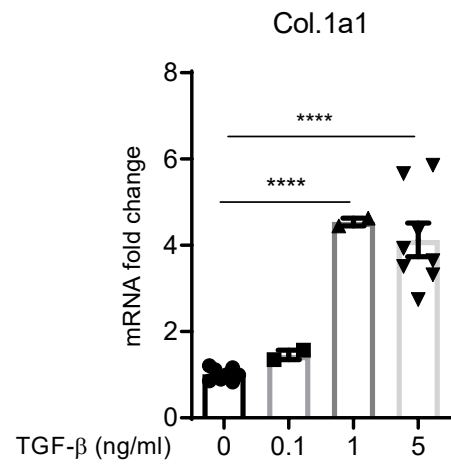

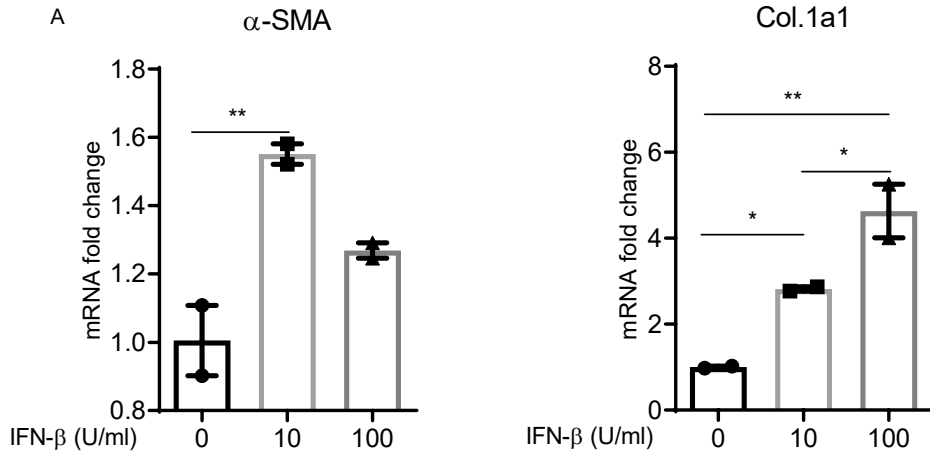



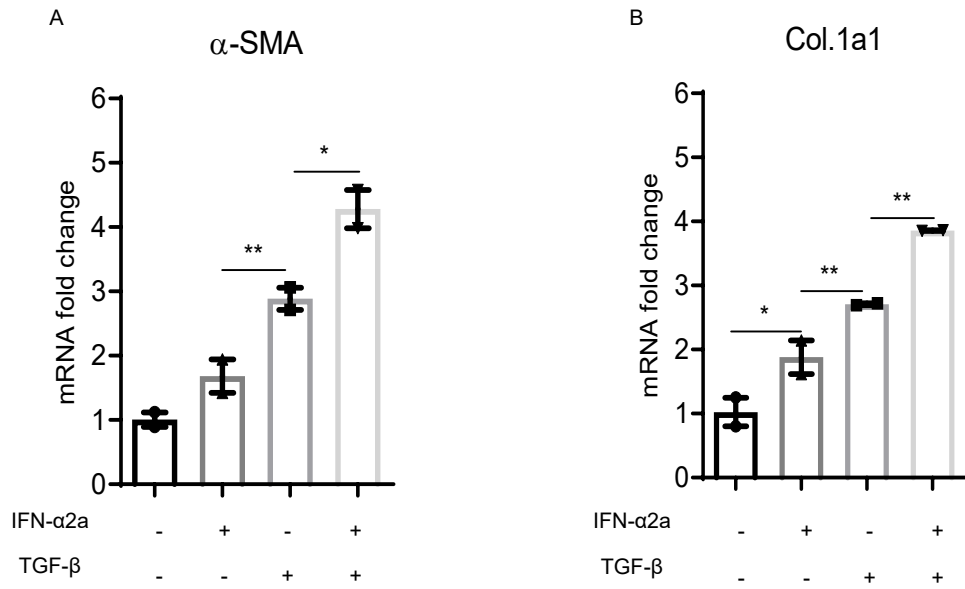

A

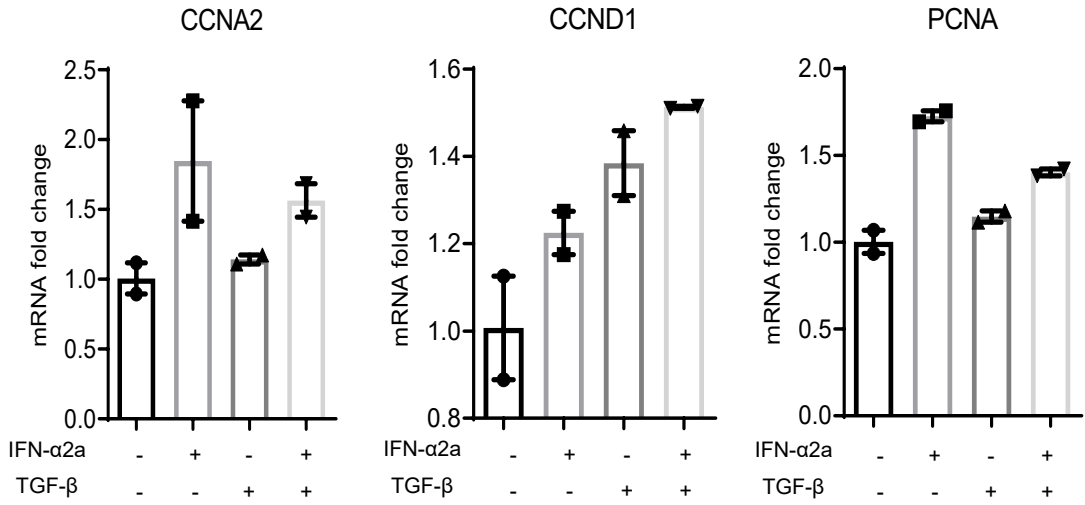

B

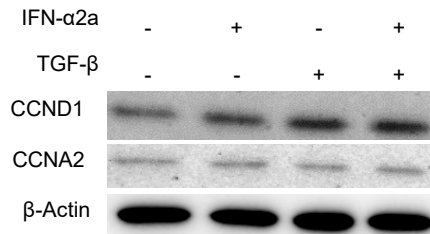

A

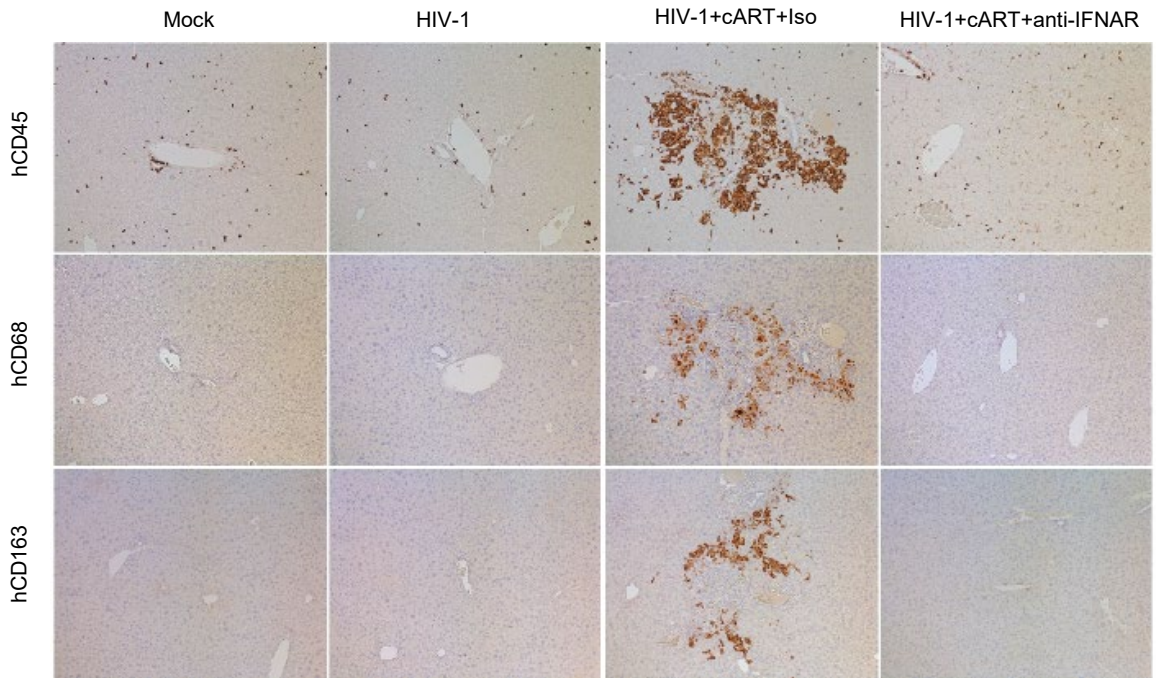

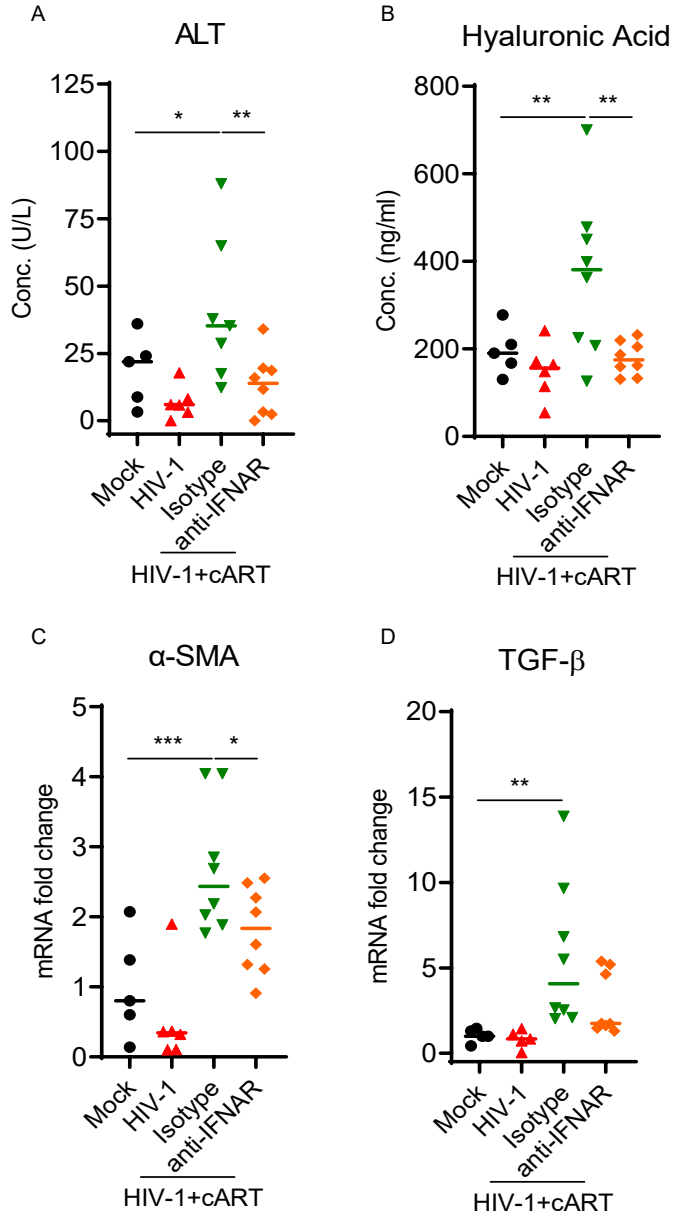

Supplement: sd1 [file 1]
